# Supplementary material for: Gold nanocluster decorated fibrous substrate for photo-modulated cellular growth
Source: Royal Society of Chemistry journal article supplement (doi:10.1039/d2tc05194j), 2023-01-01
Supplement: d2tc05194j1.pdf [file d2tc05194j1.pdf]

## Supplementary information

### Gold nanocluster decorated fibrous substrate for photo-modulated cellular growth

Bowen Li,<sup>a</sup> Yuetong Kang,<sup>a</sup> Xiaoyu Wang,<sup>\*a</sup> Pengbo Zhang,<sup>b</sup> and Lidong Li<sup>\*a</sup>

<sup>a</sup>State Key Laboratory for Advanced Metals and Materials, School of Materials Science and Engineering, University of Science and Technology Beijing, Beijing 100083, P. R. China.

E-mail address: wangxy@ustb.edu.cn; lidong@mater.ustb.edu.cn

<sup>b</sup>School of Chemistry and Biological Engineering, University of Science and Technology Beijing, Beijing 100083, P. R. China.

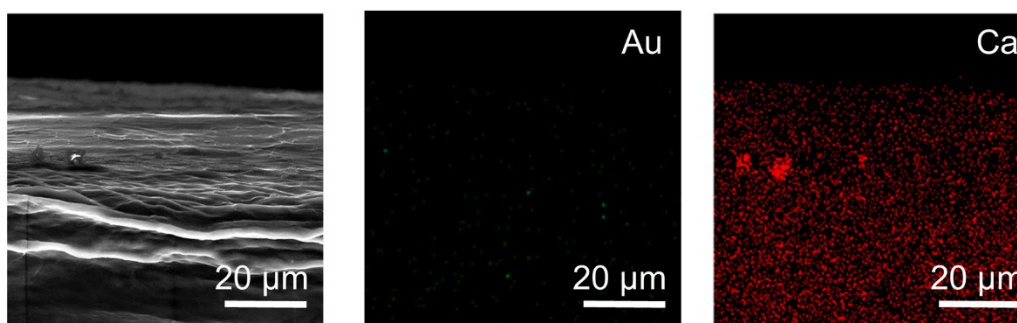

Fig. S1 Au and Ca elemental mapping images of fibrous-GG.

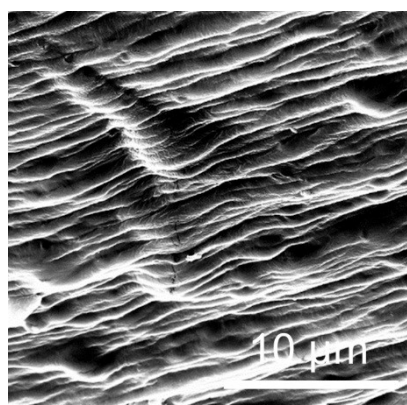

Fig. S2 Surface SEM image of fibrous-GG.

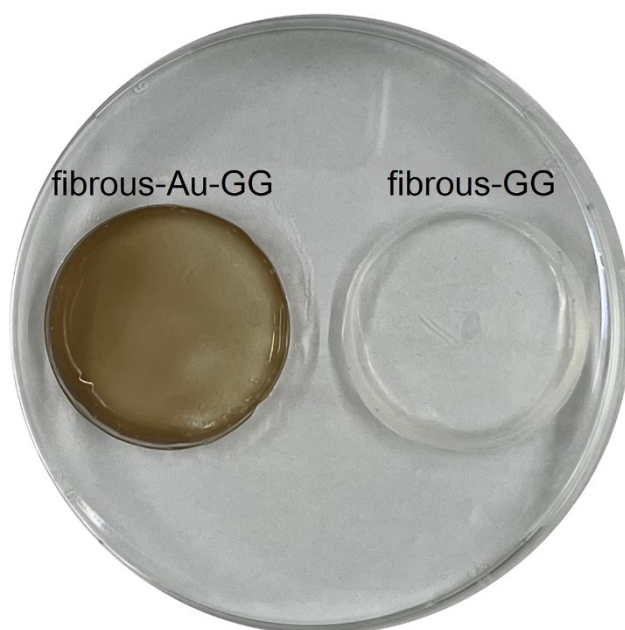

**Fig. S3** Photographs of fibrous-Au-GG and fibrous-GG.

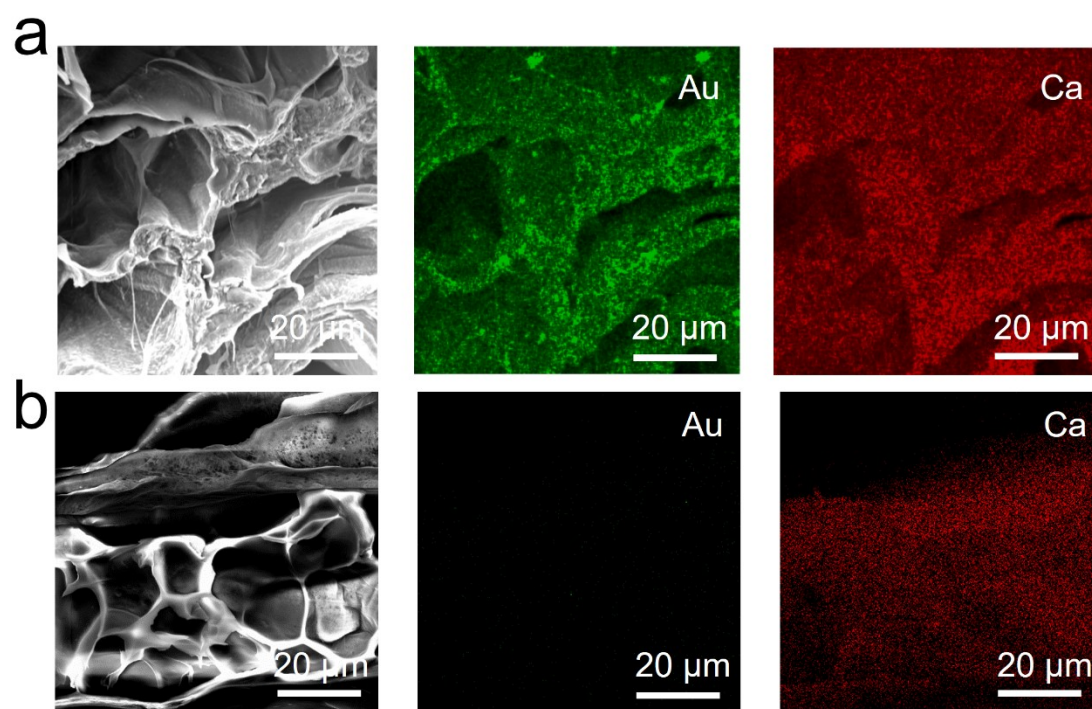

**Fig. S4** Au and Ca elemental mapping images of (a) Au-GG hydrogel and (b) GG hydrogel.

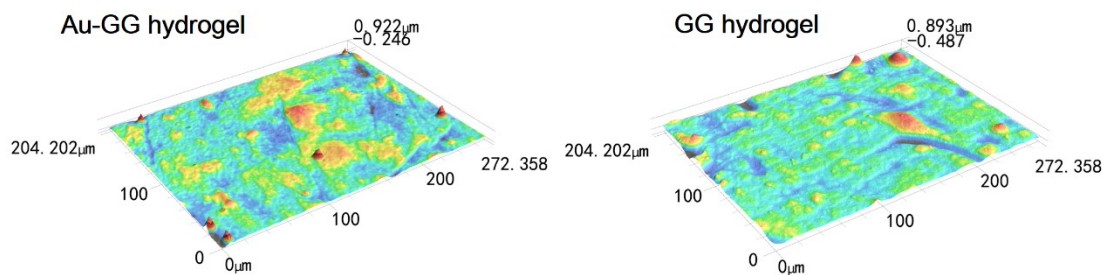

Fig. S5 Images of surface morphology of Au-GG hydrogel and GG hydrogel.

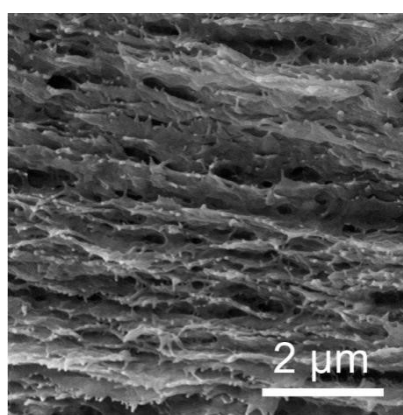

Fig. S6 SEM image of fibrous-Au-GG after irradiation.

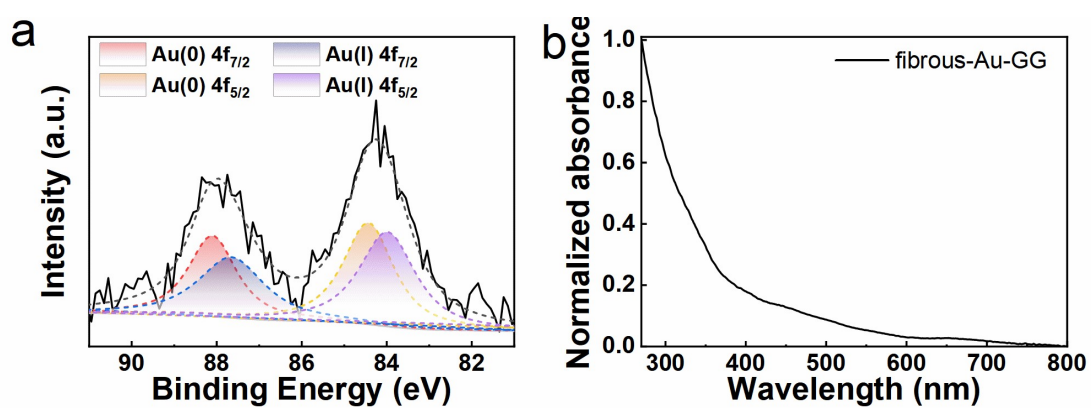

Fig. S7 (a) The XPS spectra of the Au 4f orbital in fibrous-Au-GG after irradiation. (b) Normalized absorption spectra of fibrous-Au-GG after irradiation.

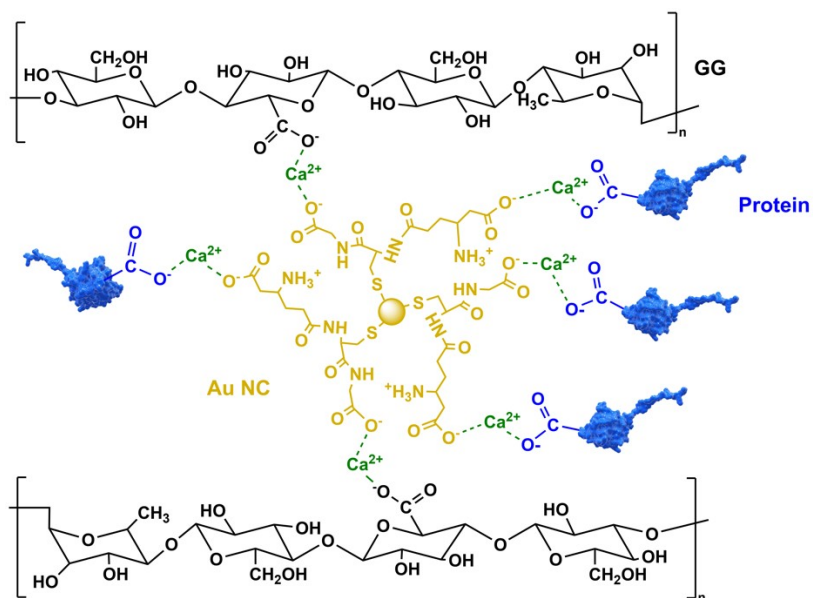

Fig. S8 Structural formula of the ionic cross-link among the Au NCs, GG and the protein.

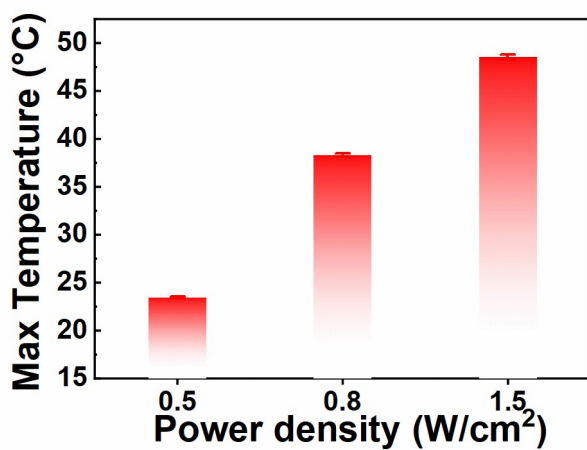

Fig. S9 Max temperature of fibrous-Au/Protein-GG upon different power density of irradiation.

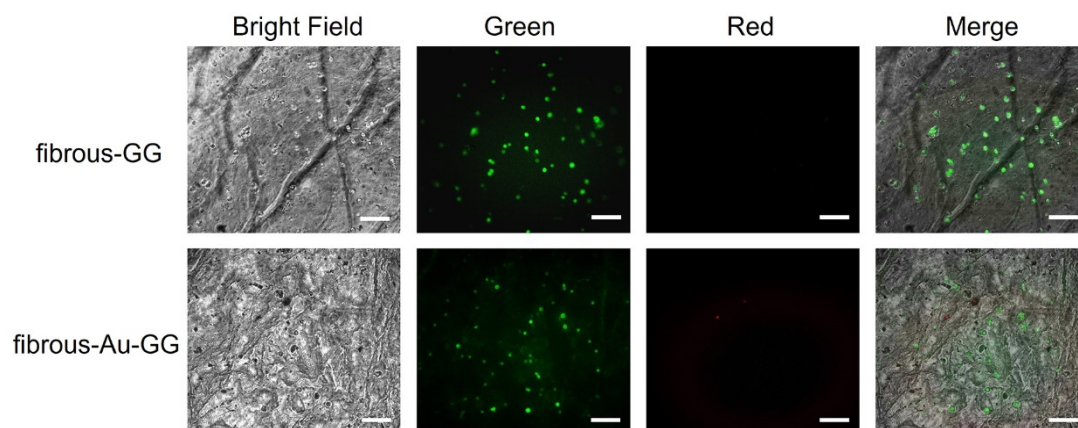

**Fig. S10** Viability of MG-63 cells adhered on fibrous-GG and fibrous-Au-GG hydrogels. The calcein emitted green fluorescence and PI emitted red fluorescence. (Scale bar, 100  $\mu\text{m}$ )

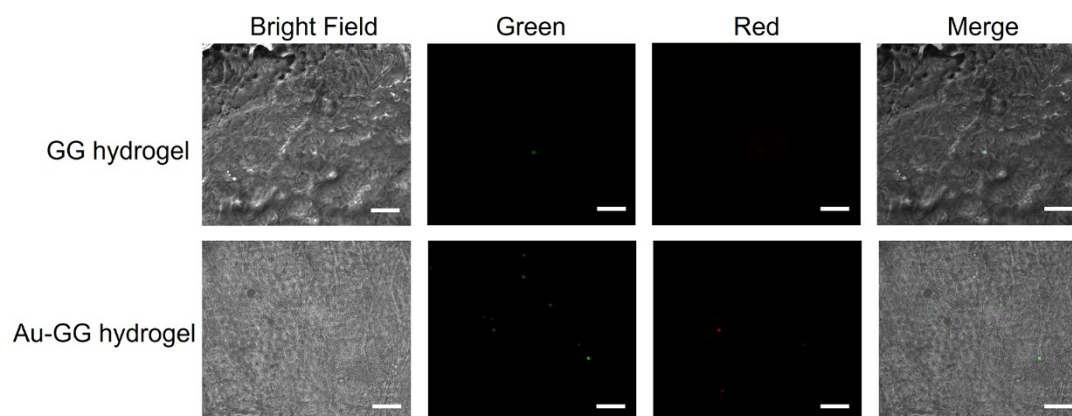

**Fig. S11** Viability of MG-63 cells adhered on GG hydrogel and Au-GG hydrogel. The calcein emitted green fluorescence and PI emitted red fluorescence. (Scale bar, 100  $\mu\text{m}$ )

**Table S1.** Calculated the Au(0): Au(I) ratios of fibrous-Au-GG and Au NC.

| fibrous-Au-GG      | Au(I) $4f_{7/2}$ | Au(I) $4f_{5/2}$ | Au(0) $4f_{5/2}$ | Au(0) $4f_{7/2}$ |
|--------------------|------------------|------------------|------------------|------------------|
| Peak (eV)          | 88.10            | 84.43            | 87.65            | 84.00            |
| Area               | 1231.357         | 1641.809         | 1271.761         | 1695.681         |
| Au(0): Au(I) ratio | 50.8:49.2        |                  |                  |                  |
| Au NC              | Au(I) $4f_{5/2}$ | Au(I) $4f_{7/2}$ | Au(0) $4f_{5/2}$ | Au(0) $4f_{7/2}$ |
| Peak (eV)          | 88.10            | 84.43            | 87.65            | 84.00            |
| Area               | 5042.83          | 6723.772         | 5225.747         | 6967.663         |
| Au(0): Au(I) ratio | 50.9:49.1        |                  |                  |                  |
